# Supplementary material for: Exportin-mediated nucleocytoplasmic transport maintains Pch2 homeostasis during meiosis
Source: PubMed Central journal article supplement (PMC10688877; doi:10.1371/journal.pgen.1011026), 2023-11-10
Supplement: pgen.1011026.s005.pdf [file pgen.1011026.s005.pdf]

NES<sup>TRIP13</sup>-Pch2-nes4A

FLTRNVQSVSIIDTELGAGAGAGAGASYIVDLQVRGSSLRVIKCMFREDEQISSLHSGSDSKQNSNKKLGEFLN  
LLKAVVKRKLESFPKDRKTSIITGQELMREGQGSIEIKDPPTAQQLIRSLAKVLLHQFSSINGKVNTVNEG  
QDNLFSLFVKKISIEQQSTSHVSIKLNFKHEKINLGQHIDSILDSEETNESDTHMGSVDEFI IYPFCCLEEQD  
ELKNGSIASTEADKADAELDEDDGFEGETLNNCINSVGNFDIPLSKQTLNLVNI SYLPGTTFEGQWESLYFGNN  
IKERLYSYATISLKIARFKQTGDSNQEDITTLITNNKLLL VHGPPGTGKTTLCKALCQKLSVRREFSDGSDTID  
TNYKGIIIELSCARIFSKWFGESSKNISIVFKDIEELLKVNEGRGIFICLLIDEVEAIASSRTNLSSRNESTDG  
IRVVNTLLTQLDRLKKYHNFLALATSNNLLDSLDDAFVDRADGVFVGNPTAEGILHILKVCIEEMITSGIILFH  
ARSTGVKFFNKYQDILRKIAIKSTVDISGRITIRKLPMLCLSEYFRTFPVDDDEFVLALAMSARKLSAARK\*

FLTRNVQSVSIIDTEL: 1-16 NES<sup>TRIP13</sup>

GAGAGAGAGA: 17-26 flexible linker

ASTEADKADA: 230-239 nes<sup>Pch2-4A</sup>

S5 Fig
