# Supplementary material for: Exportin-mediated nucleocytoplasmic transport maintains Pch2 homeostasis during meiosis
Source: PubMed Central journal article supplement (PMC10688877; doi:10.1371/journal.pgen.1011026), 2023-11-10
Supplement: pgen.1011026.s006.pdf [file pgen.1011026.s006.pdf]

**S1 Table. *Saccharomyces cerevisiae* strains**

| Strain    | Genotype*                                                                                                                                 | Source     |
|-----------|-------------------------------------------------------------------------------------------------------------------------------------------|------------|
| BR1919-2N | <i>MATa/MATα leu2-3,112 his4-260 thr1-4 trp1-289 ura3-1 ade2-1</i>                                                                        | Roeder Lab |
| DP421     | BR1919-2N <i>lys2ΔNheI</i>                                                                                                                | PSS Lab    |
| DP422     | DP421 <i>zip1Δ::LYS2</i>                                                                                                                  | PSS Lab    |
| DP881     | DP421 <i>zip1Δ::LYS2 pch2Δ::TRP1 ndt80Δ::LEU2</i>                                                                                         | PSS Lab    |
| DP1023    | DP421 <i>pch2Δ::TRP1</i>                                                                                                                  | PSS Lab    |
| DP1029    | DP421 <i>zip1Δ::LYS2 pch2Δ::TRP1</i>                                                                                                      | PSS Lab    |
| DP1405    | DP421 <i>zip1Δ::LEU2 pch2Δ::URA3</i>                                                                                                      | PSS Lab    |
| DP1620    | BR1919-2N <i>P<sub>HOP1</sub>-GFP-PCH2</i>                                                                                                | PSS Lab    |
| DP1621    | BR1919-2N <i>zip1Δ::LEU2 P<sub>HOP1</sub>-GFP-PCH2</i>                                                                                    | PSS Lab    |
| DP1624    | BR1919-2N <i>P<sub>HOP1</sub>-GFP-PCH2/pch2Δ::TRP1</i>                                                                                    | PSS Lab    |
| DP1625    | BR1919-2N <i>zip1Δ::LEU2 P<sub>HOP1</sub>-GFP-PCH2/pch2Δ::TRP1</i>                                                                        | PSS Lab    |
| DP1639    | BR1919-2N <i>P<sub>HOP1</sub>-GFP-PCH2 ndt80Δ::kanMX3</i>                                                                                 | PSS Lab    |
| DP1655    | BR1919-2N <i>zip1Δ::LEU2 P<sub>HOP1</sub>-GFP-PCH2/pch2Δ::TRP1 ndt80Δ::kanMX3 LYS2/lys2ΔNheI</i>                                          | PSS Lab    |
| DP1717    | DP421 <i>crm1Δ::hphMX4 pSS416(LEU2)-crm1-T539C P<sub>HOP1</sub>-GFP-PCH2</i>                                                              | This work  |
| DP1721    | DP421 <i>zip1Δ::LYS2 crm1Δ::hphMX4 pSS416(LEU2)-crm1-T539C P<sub>HOP1</sub>-GFP-PCH2</i>                                                  | This work  |
| DP1787    | DP421 <i>spo11-3HA-6His::kanMX4 pch2Δ::TRP1</i>                                                                                           | PSS Lab    |
| DP1788    | DP421 <i>spo11-3HA-6His::kanMX4 P<sub>HOP1</sub>-GFP-PCH2</i>                                                                             | This work  |
| DP1837    | DP421 <i>zip1Δ::LYS2 crm1Δ::hphMX4 pSS416(LEU2)-crm1-T539C ndt80Δ::kanMX6 P<sub>HOP1</sub>-GFP-PCH2</i>                                   | This work  |
| DP1885    | DP421 <i>orc1-3mAID::hphNT P<sub>HOP1</sub>-OstTIR1::URA3 crm1Δ::natMX4 pSS416(LEU2)-crm1-T539C P<sub>HOP1</sub>-GFP-PCH2</i>             | This work  |
| DP1886    | DP421 <i>zip1Δ::LYS2 orc1-3mAID::hphNT P<sub>HOP1</sub>-OstTIR1::URA3 crm1Δ::natMX4 pSS416(LEU2)-crm1-T539C P<sub>HOP1</sub>-GFP-PCH2</i> | This work  |
| DP1927    | DP421 <i>crm1Δ::hphMX4 pSS416(LEU2)-crm1-T539C ndt80Δ::kanMX6 P<sub>HOP1</sub>-GFP-PCH2</i>                                               | This work  |
| DP1986    | DP421 <i>zip1Δ::LYS2 P<sub>HOP1</sub>-GFP-pch2-nes4A/pch2Δ::TRP1</i>                                                                      | This work  |
| DP1988    | DP421 <i>zip1Δ::LYS2 P<sub>HOP1</sub>-GFP-pch2-nes4A/pch2Δ::TRP1 ndt80::LEU2</i>                                                          | This work  |
| DP1992    | DP421 <i>zip1Δ::LYS2 P<sub>HOP1</sub>-GFP-NES<sup>PKI</sup>-pch2-nes4A/pch2Δ::TRP1</i>                                                    | This work  |
| DP2003    | DP421 <i>zip1Δ::LYS2 P<sub>HOP1</sub>-GFP-NES<sup>PKI</sup>-pch2-nes4A/pch2Δ::TRP1 ndt80Δ::kanMX6</i>                                     | This work  |

|        |                                                                                             |           |
|--------|---------------------------------------------------------------------------------------------|-----------|
| DP2025 | DP421 <i>zip1Δ::LYS2 P<sub>HOP1</sub>-GFP-NES<sup>TRIP13</sup>-pch2-nes4A/pch2Δ::TRP1</i>   | This work |
| DP2033 | DP421 <i>zip1Δ::LYS2 P<sub>HOP1</sub>-GFP-nes7A<sup>TRIP13</sup>-pch2-nes4A/pch2Δ::TRP1</i> | This work |
| DP2046 | DP421 <i>spo11-3HA-6His::kanMX4 P<sub>HOP1</sub>-GFP-pch2-nes4A</i>                         | This work |
| DP2052 | DP421 <i>P<sub>HOP1</sub>-GFP-pch2-nes4A</i>                                                | This work |
| DP2053 | DP421 <i>P<sub>HOP1</sub>-GFP-pch2-nes4A ndt80Δ::kanMX6</i>                                 | This work |

\*All strains are diploids isogenic to BR1919 and, unless specified, homozygous for the indicated markers. DP421 is a *lys2* version of the original BR1919-2N.
