# Supplementary material for: Exportin-mediated nucleocytoplasmic transport maintains Pch2 homeostasis during meiosis
Source: PubMed Central journal article supplement (PMC10688877; doi:10.1371/journal.pgen.1011026), 2023-11-10
Supplement: pgen.1011026.s007.pdf [file pgen.1011026.s007.pdf]

**S2 Table. Plasmids**

| <b>Plasmid name</b> | <b>Vector</b> | <b>Relevant description</b>                                              | <b>Source / Reference</b> |
|---------------------|---------------|--------------------------------------------------------------------------|---------------------------|
| pSS393              | pRS314        | <i>TRIP1 CEN6 P<sub>HOP1</sub>-GFP-PCH2</i>                              | [1]                       |
| pSS416              | pRS315        | <i>LEU2 CEN6 crm1-T539C</i>                                              | [2]                       |
| pSS448              | pRS314        | <i>TRIP1 CEN6 P<sub>HOP1</sub>.GFP-pch2-ntd<sup>98-107</sup>-6A</i>      | This work                 |
| pSS451              | pRS314        | <i>TRIP1 CEN6 P<sub>HOP1</sub>.GFP-pch2-ntd<sup>127-136</sup>-5A</i>     | This work                 |
| pSS459              | pRS314        | <i>TRIP1 CEN6 P<sub>HOP1</sub>.GFP-pch2-nes4A</i>                        | This work                 |
| pSS462              | pRS314        | <i>TRIP1 CEN6 P<sub>HOP1</sub>.GFP-NES<sup>PK1</sup>-pch2-nes4A</i>      | This work                 |
| pSS472              | pRS314        | <i>TRIP1 CEN6 P<sub>HOP1</sub>.GFP-NES<sup>TRIP13</sup>-pch2-nes4A</i>   | This work                 |
| pSS474              | pRS314        | <i>TRIP1 CEN6 P<sub>HOP1</sub>.GFP-nes7A<sup>TRIP13</sup>-pch2-nes4A</i> | This work                 |

**References**

[1] Herruzo E, Santos B, Freire R, Carballo JA, San-Segundo PA. Characterization of Pch2 localization determinants reveals a nucleolar-independent role in the meiotic recombination checkpoint. *Chromosoma*. 2019;128(3):297-316. doi: 10.1007/s00412-019-00696-7

[2] Moriggi G, Nieto B, Dosil M. Rrp12 and the Exportin Crm1 participate in late assembly events in the nucleolus during 40S ribosomal subunit biogenesis. *PLoS Genet*. 2014;10(12):e1004836. doi: 10.1371/journal.pgen.1004836
