# Supplementary material for: Exportin-mediated nucleocytoplasmic transport maintains Pch2 homeostasis during meiosis
Source: PubMed Central journal article supplement (PMC10688877; doi:10.1371/journal.pgen.1011026), 2023-11-10
Supplement: pgen.1011026.s008.pdf [file pgen.1011026.s008.pdf]

**S3 Table. Antibodies**

| Antibody                       | Host and type     | Application*<br>(Dilution) | Source / Reference         |
|--------------------------------|-------------------|----------------------------|----------------------------|
| Hop1                           | Rabbit polyclonal | IF (1:300)                 | (1)                        |
| Hop1-T318-P                    | Rabbit polyclonal | WB (1:1000)                | (2)                        |
| Pgk1 (22C5D8)                  | Mouse monoclonal  | WB (1:5000)                | Molecular Probes<br>459250 |
| Pch2                           | Rabbit polyclonal | WB (1:2000)<br>IF (1:200)  | (3)                        |
| Nsr1 (31C4)                    | Mouse monoclonal  | IF (1:200)                 | ThermoFisher<br>MA1-10030  |
| Zip1                           | Rabbit polyclonal | IF (1:200)                 | (4)                        |
| GFP (JL-8)                     | Mouse monoclonal  | IF (1:200)                 | Clontech<br>632381         |
| Anti-mouse HRP                 | Sheep polyclonal  | WB (1:5000)                | GE Healthcare<br>NXA931    |
| Anti-rabbit HRP                | Donkey polyclonal | WB (1:5000)                | GE Healthcare<br>NA934     |
| Anti-rabbit<br>Alexa Fluor 594 | Goat polyclonal   | IF (1:200)                 | Molecular Probes<br>A11012 |
| Anti-rabbit<br>Alexa Fluor 488 | Goat polyclonal   | IF (1:200)                 | Molecular Probes<br>A11034 |
| Anti-mouse<br>Alexa Fluor 594  | Goat polyclonal   | IF (1:200)                 | Molecular Probes<br>A11032 |
| Anti-mouse<br>Alexa Fluor 488  | Goat polyclonal   | IF (1:200)                 | Molecular Probes<br>A11029 |

\*WB, western blot; IF, immunofluorescence

1. Smith, A.V. and Roeder, G.S. (1997) The yeast Red1 protein localizes to the cores of meiotic chromosomes. *J Cell Biol*, **136**: 957-967.
2. Penedos A, Johnson AL, Strong E, Goldman AS, Carballo JA, Cha RS (2015) Essential and Checkpoint Functions of Budding Yeast ATM and ATR during Meiotic Prophase Are Facilitated by Differential Phosphorylation of a Meiotic Adaptor Protein, Hop1. *PLoS ONE* **10**: e0134297.
3. Herruzo, E., Santos, B., Freire, R., Carballo, J.A. and San-Segundo, P.A. (2019) Characterization of Pch2 localization determinants reveals a nucleolar-independent role in the meiotic recombination checkpoint. *Chromosoma*, **128**: 297-316.
4. Sym M, Engebrecht JA, Roeder GS (1993) ZIP1 is a synaptonemal complex protein required for meiotic chromosome synapsis. *Cell* 72:365–378
